# Supplementary material for: Adipocyte-Specific Inhibition of Mir221/222 Ameliorates Diet-Induced Obesity Through Targeting Ddit4
Source: PubMed Central journal article supplement (PMC8762293; doi:10.3389/fendo.2021.750261), 2022-01-03
Supplement: DataSheet_1.pdf [file DataSheet_1.pdf]

# Supplementary Figure 1

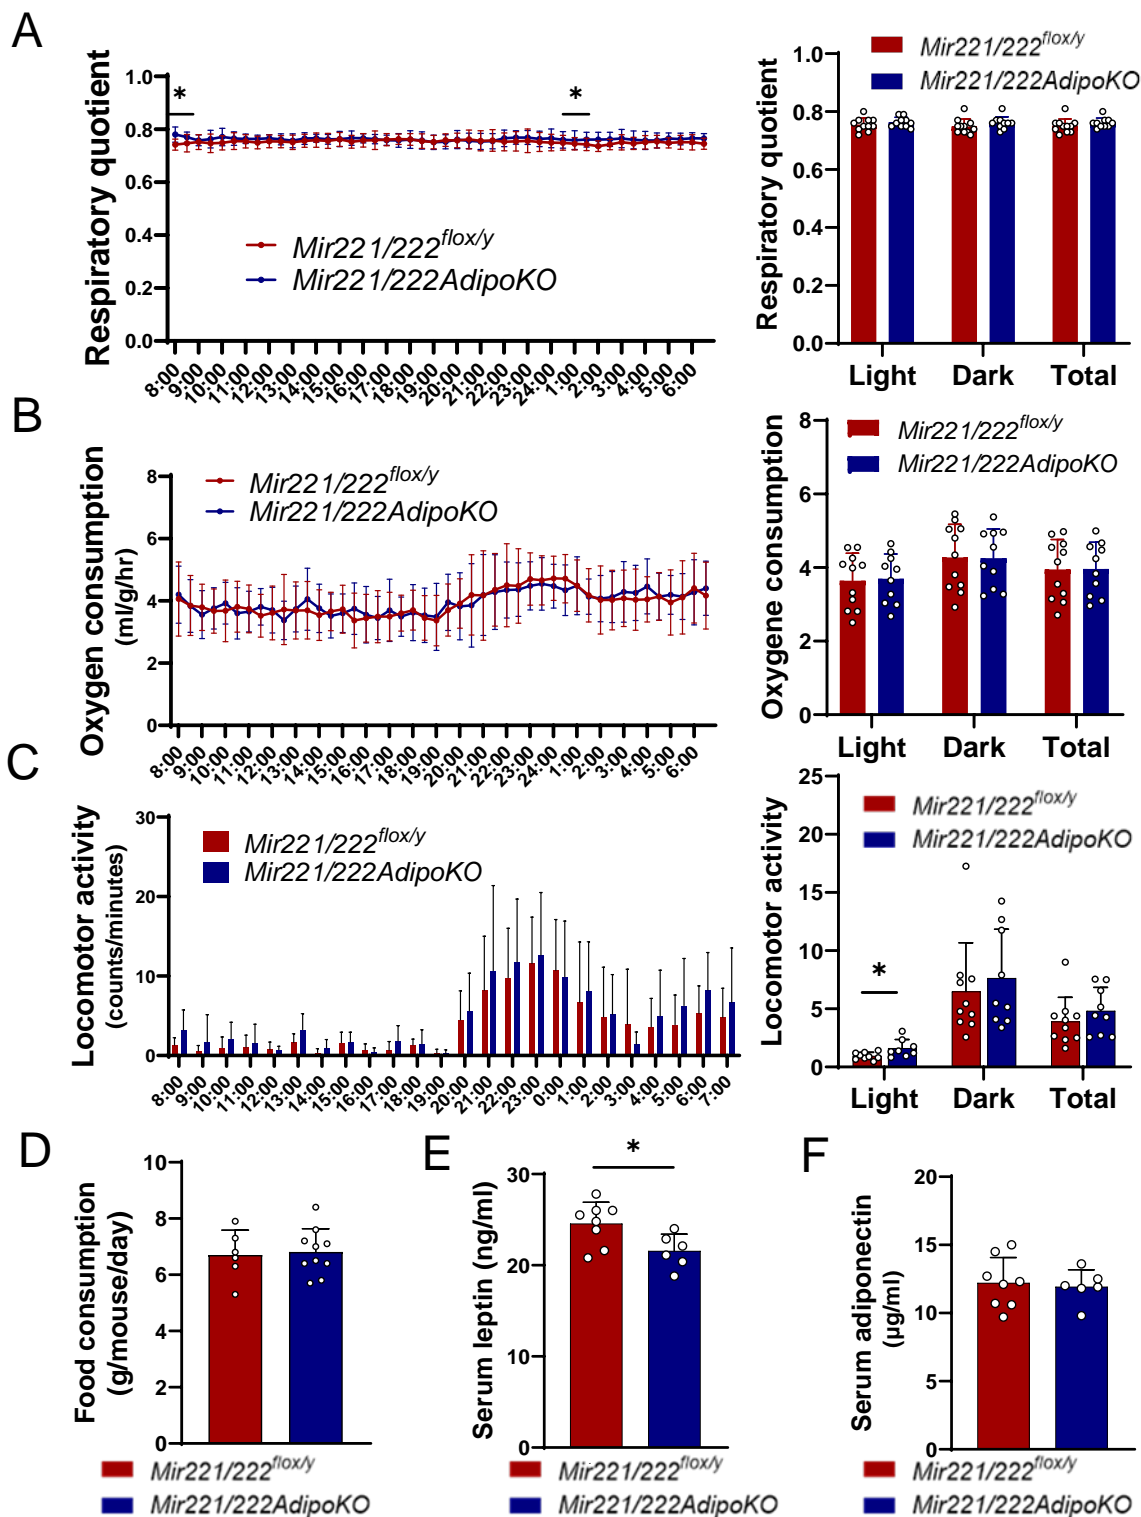

**Supplementary Figure 1.** Basal metabolic rate, locomotor activity and food intake. (**A** and **B**) Respiratory quotient (RQ) and Oxygen consumption rate in *Mir221/222<sup>flox/y</sup>* (n=11) and *Mir221/222AdipoKO* (n=10) mice fed with HFHS (high fat high sucrose) chow. (**C**) Locomotor activity in *Mir221/222<sup>flox/y</sup>* (n=10) and *Mir221/222AdipoKO* (n=9) mice fed with HFHS chow. (**D**) Food consumption in *Mir221/222<sup>flox/y</sup>* (n=5) and *Mir221/222AdipoKO* (n=10) mice fed with HFHS chow. (**E**) Serum leptin levels in *Mir221/222<sup>flox/y</sup>* (n=8) and *Mir221/222AdipoKO* (n=6) mice fed with HFHS chow. (**F**) Serum adiponectin levels in *Mir221/222<sup>flox/y</sup>* (n=8) and *Mir221/222AdipoKO* (n=6) mice fed with HFHS chow. Data shown as mean  $\pm$  SD and analyzed by Mann-Whitney's U test (\* $p < 0.05$ ).

# Supplementary Figure 2

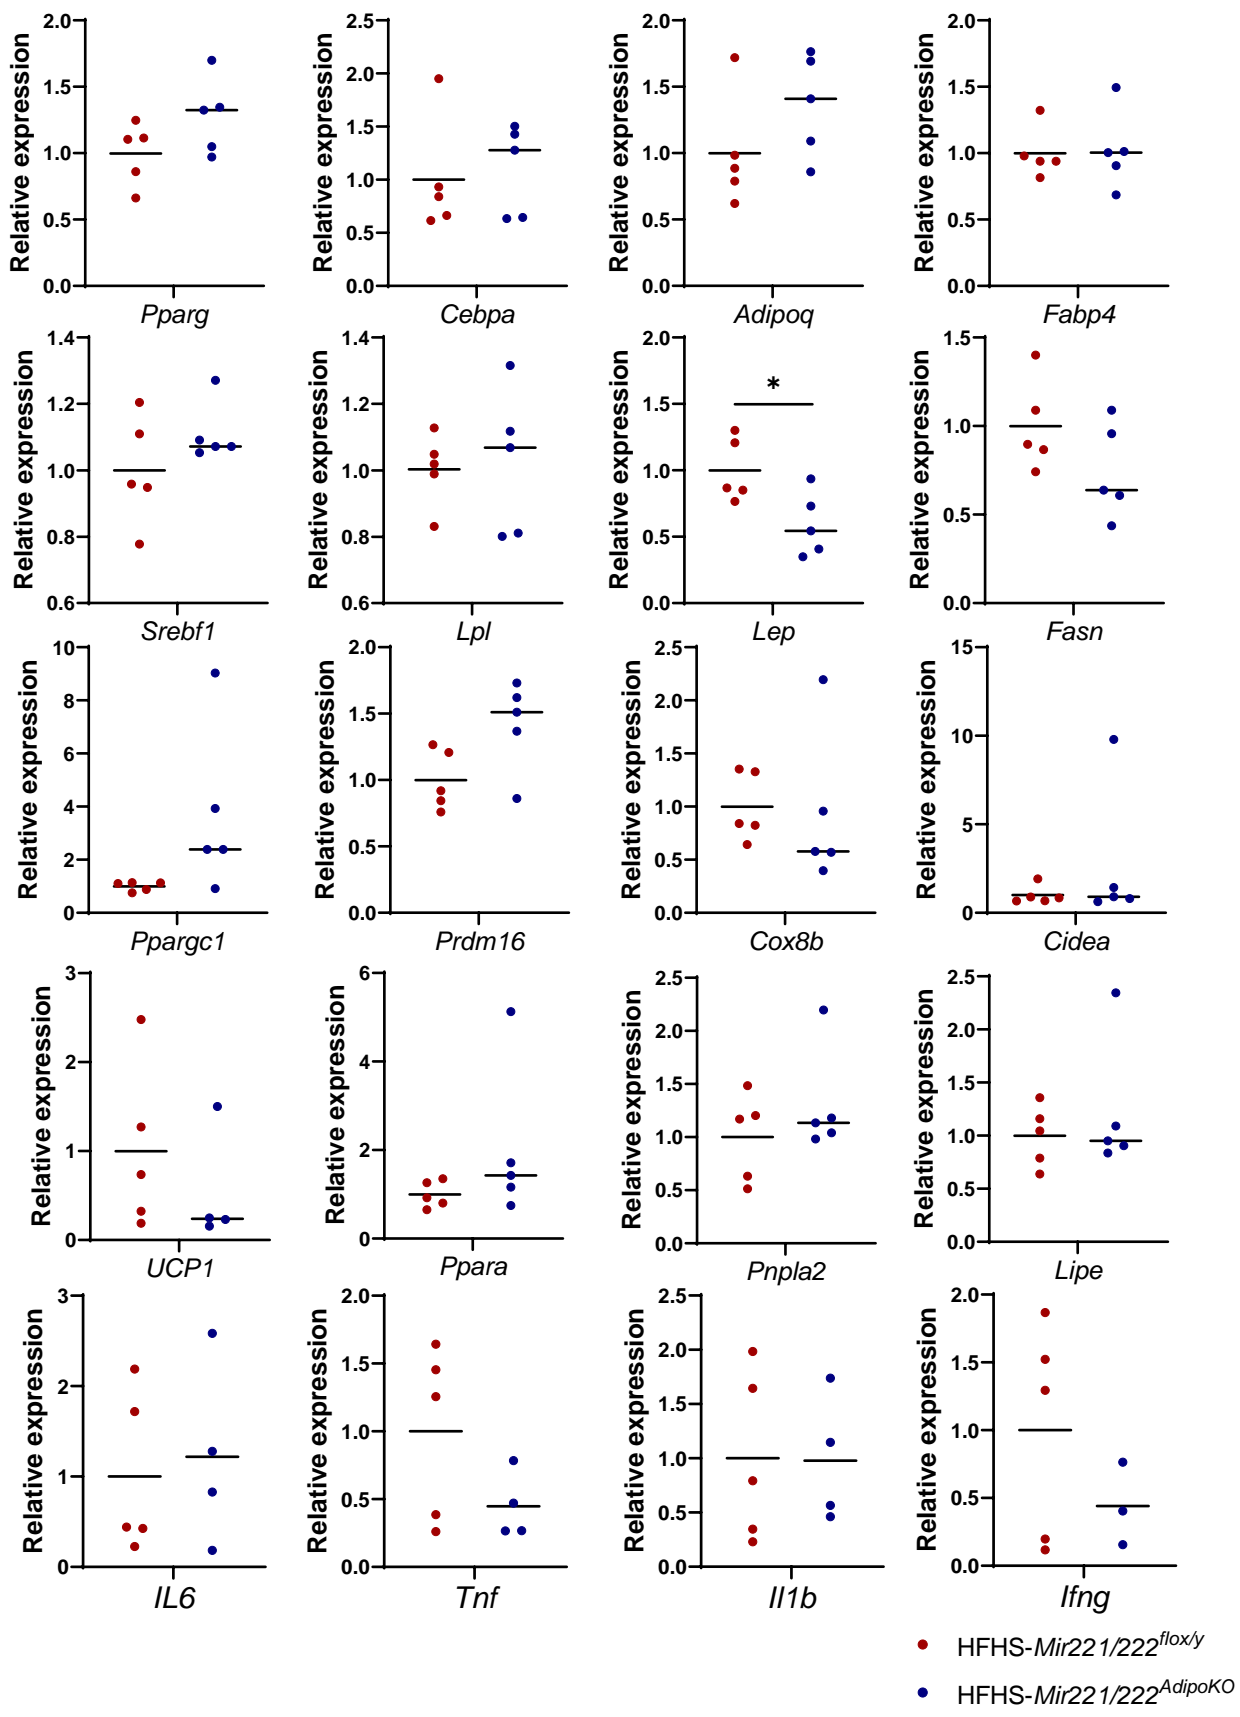

**Supplementary Figure 2.** mRNA expression of various genes. *Mir221/222*<sup>fl</sup>/<sub>y</sub> (n=5) and *Mir221/222*<sup>AdipoKO</sup> (n=5) mice fed with HFHS (high fat high sucrose) chow. Data shown as mean ± SD and analyzed by Mann-Whitney's U test (\*p<0.05).

# Supplementary Figure 3

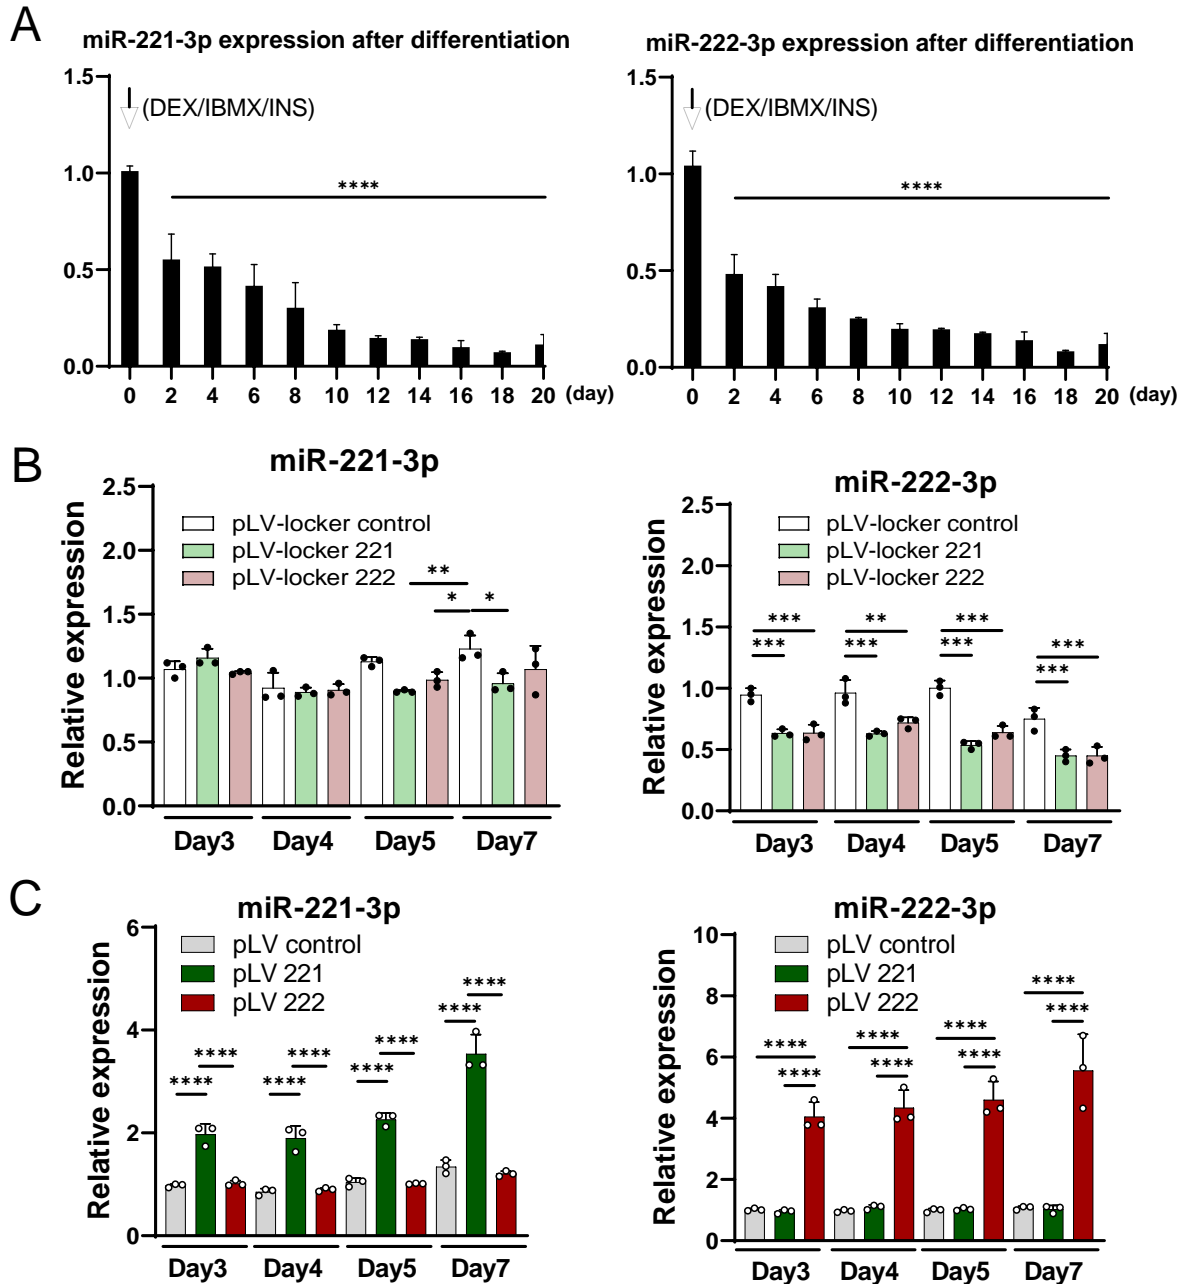

**Supplementary Figure 3.** Expression of miR-221-3p and miR-222-3p in 3T3-L1 cells. **(A)** Expression of miR-221-3p and miR-222-3p after the induction of adipocyte differentiation by dexamethasone, isobutylmethylxanthine, 1-methyl-3-isobutylxanthine and insulin (DEX/IBMX/INS). (n=3) **(B)** Expression of miR-221-3p and miR-222-3p in 3T3L1 cells treated with pLV-locker control, pLV-locker 221, and pLV-locker 222. **(C)** Expression of miR-221-3p and miR-222-3p in 3T3-L1 cells treated with pVL control, pLV 221, and pLV 222. Data shown as mean  $\pm$  SD and analyzed one-way ANOVA with Tukey test (\* $p < 0.05$ ; \*\* $p < 0.01$ ; \*\*\* $p < 0.001$ ; \*\*\*\* $p < 0.0001$ ).

# Supplementary Figure 4

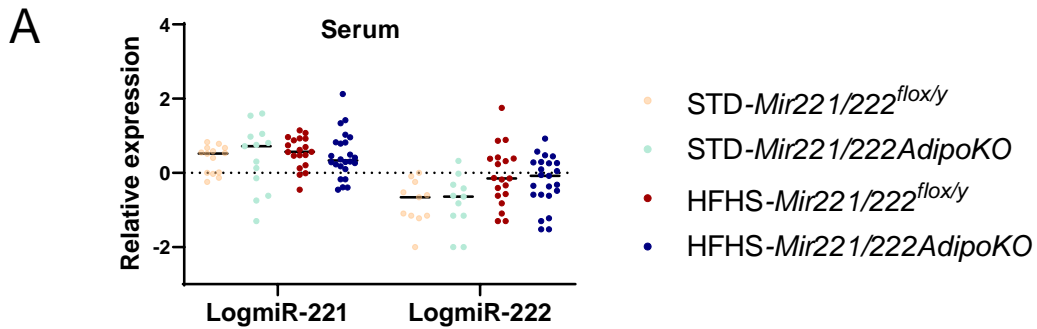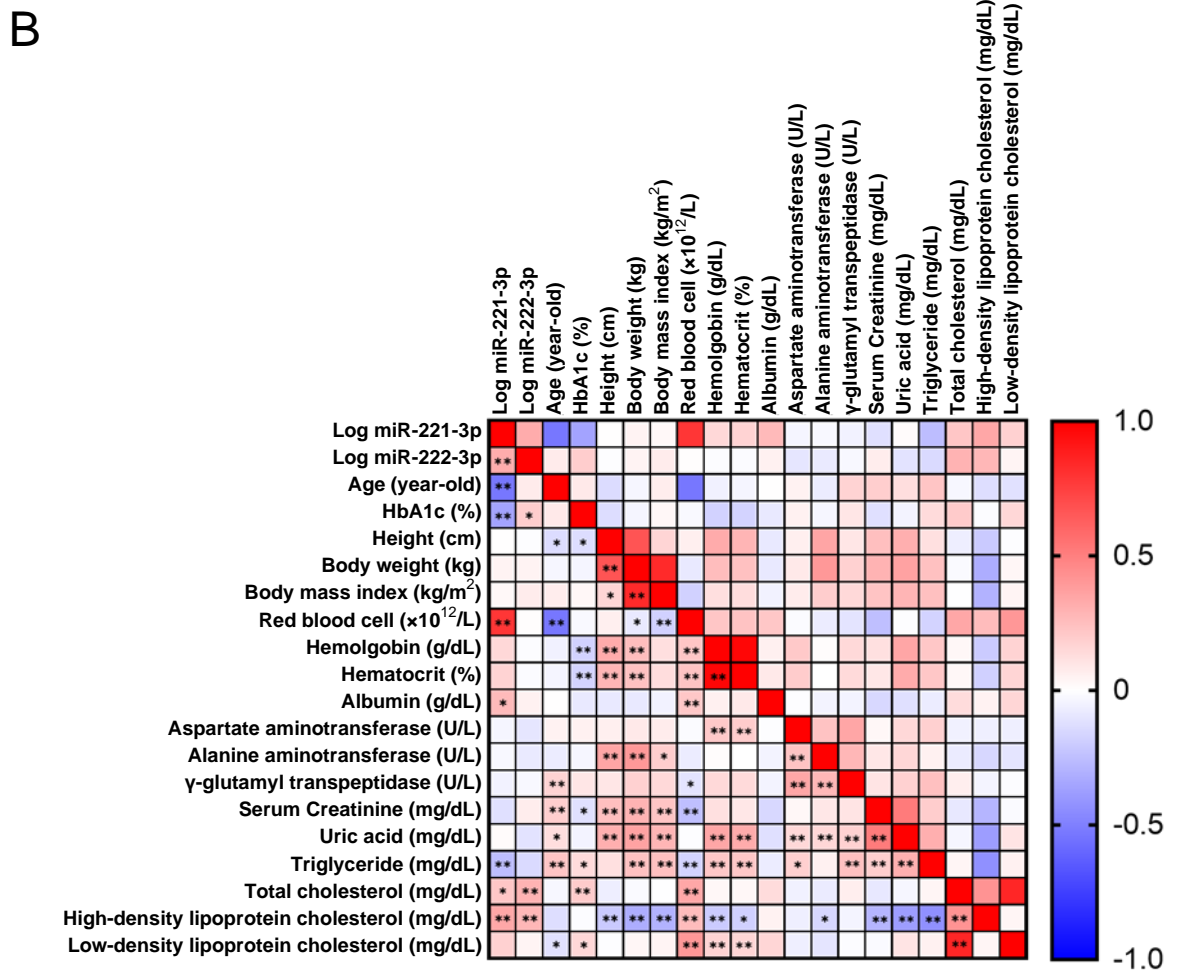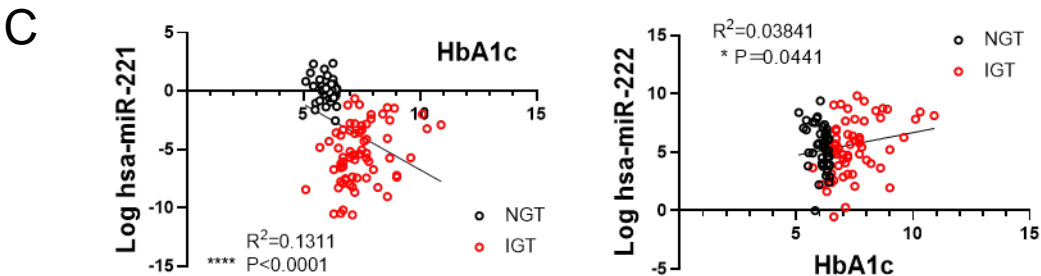

**Supplementary Figure 4.** Serum concentration of miR-221-3p and miR-222-3p levels in mice and human. **(A)** Serum concentrations of miR-221-3p and miR-222-3p levels in *Mir221/222<sup>flox/y</sup>* (n=14) and *Mir221/222<sup>AdipoKO</sup>* (n=13) mice fed with STD (standard) chow, *Mir221/222<sup>flox/y</sup>* (n=19) and *Mir221/222<sup>AdipoKO</sup>* (n=24) mice fed with HFHS (high fat high sucrose) chow. **(B)** Simple correlations of serum miR-221-3p and miR-222-3p levels with various clinical parameters in the subjects with normal glucose tolerance (NGT, n=45) and impaired glucose tolerance (IGT, n=69) (n=114). In correlation matrix, Spearman's rank correlation coefficient is shown. \*p<0.05, \*\*p<0.01. **(C)** Log hsa-miR-221-3p negatively correlates with HbA1c, while Log hsa-miR-222-3p positively correlates with HbA1c.

# Supplementary Figure 5

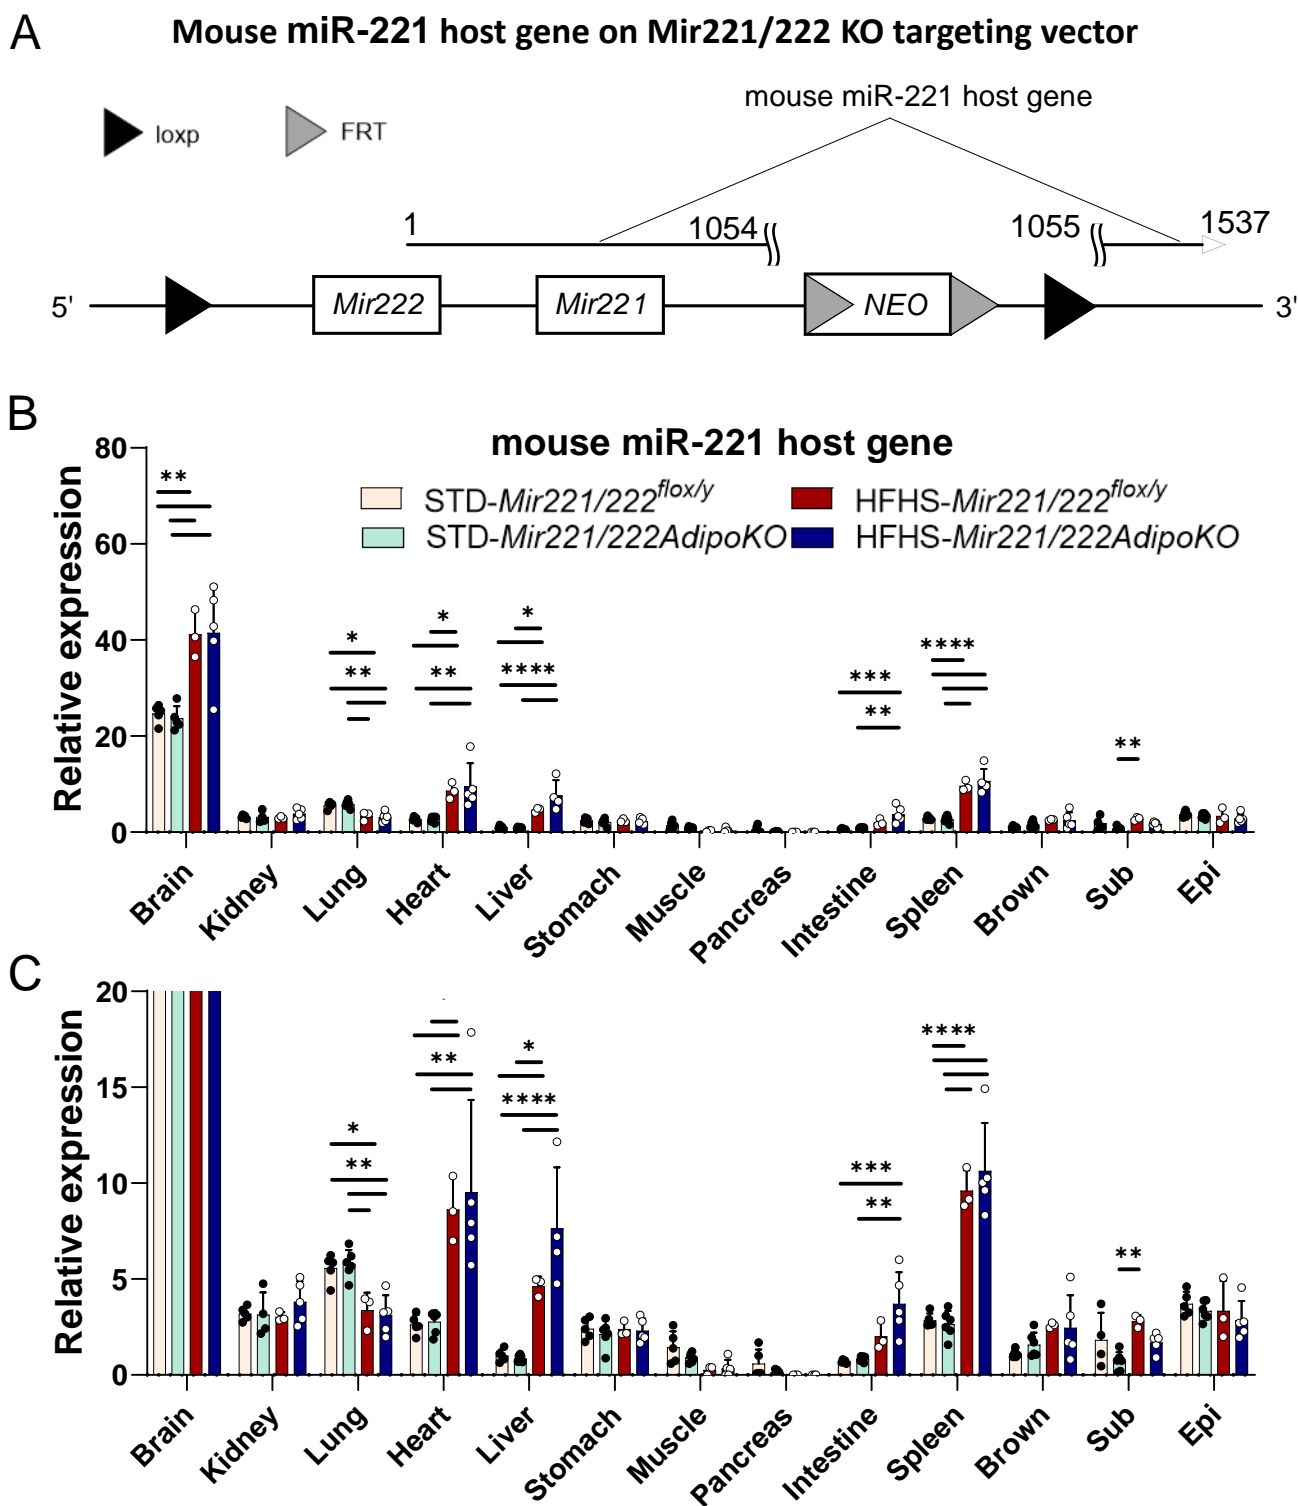

**Supplementary Figure 5.** Expression of miR-221 host gene (*Mir221hg*) in various tissues. **(A)** *Mir221/222* KO targeting vector map and location of miR-221 host gene (*Mir221hg*). The single exon of *Mir221hg* is disrupted by NEO. **(B and C)** Expression of *Mir221hg* in various tissues in *Mir221/222*<sup>flox/y</sup> (n=5) and *Mir221/222*<sup>AdipoKO</sup> (n=6) mice fed with STD (standard) chow, *Mir221/222*<sup>flox/y</sup> (n=3) and *Mir221/222*<sup>AdipoKO</sup> (n=5) mice fed with HFHS (high fat high sucrose) chow. Whole range of relative expression (0 to 80) is shown in panel **B** and narrow range (0 to 20) in panel **C**. Data shown as mean  $\pm$  SD and analyzed by one-way ANOVA with Tukey test. (\*p<0.05; \*\*p<0.01; \*\*\*p<0.001; \*\*\*\*p<0.0001).

# Supplementary Figure 6

Uncropped images in Figure 3B

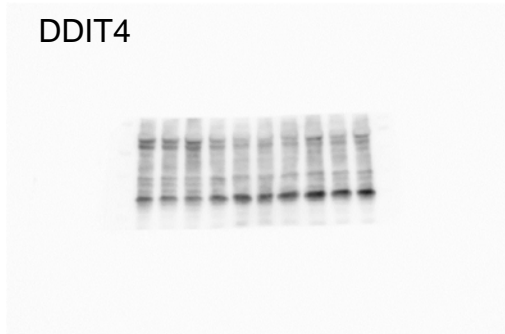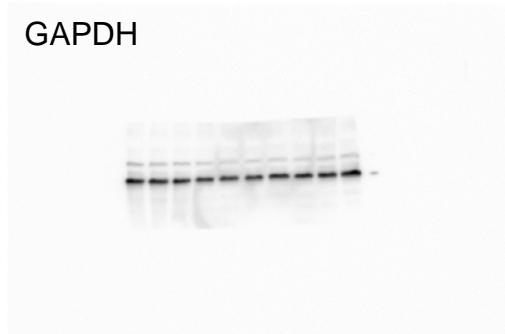

Uncropped images in Figure 4A

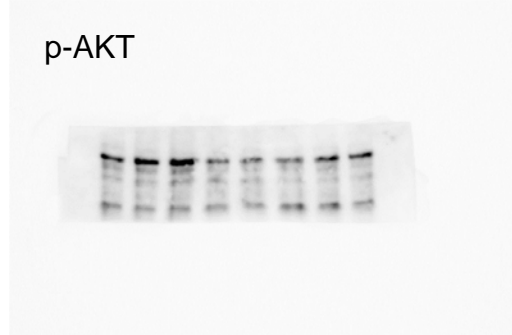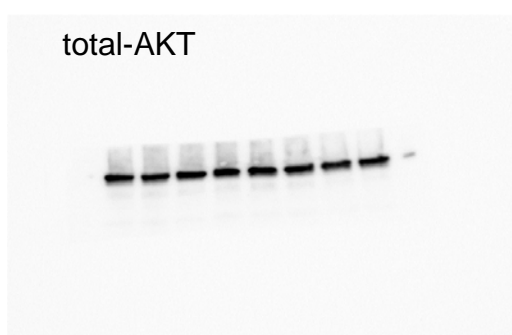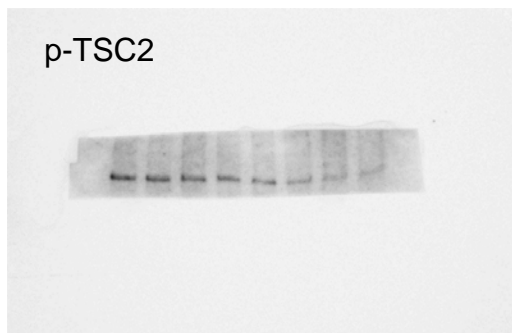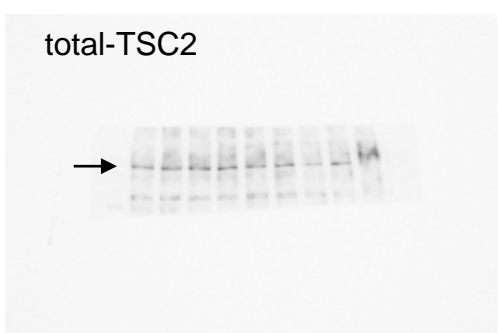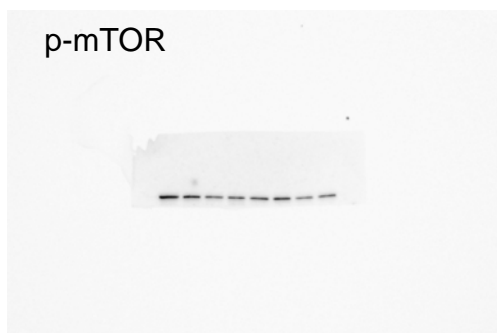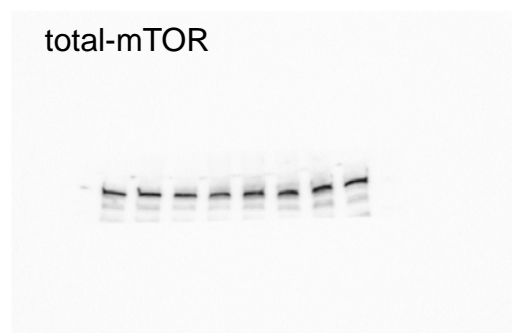

# Supplementary Figure 7

Uncropped images in Figure 4A

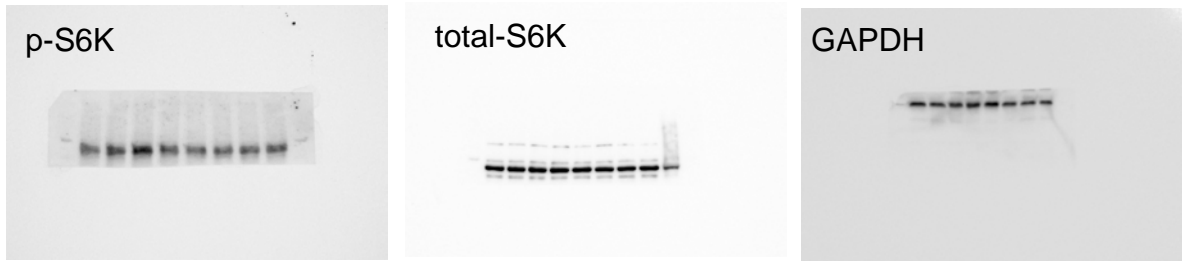

Uncropped images in Figure 5C,D

C

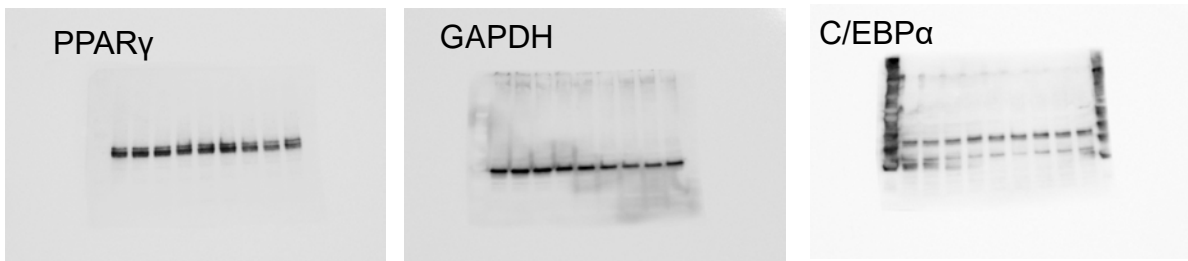

D

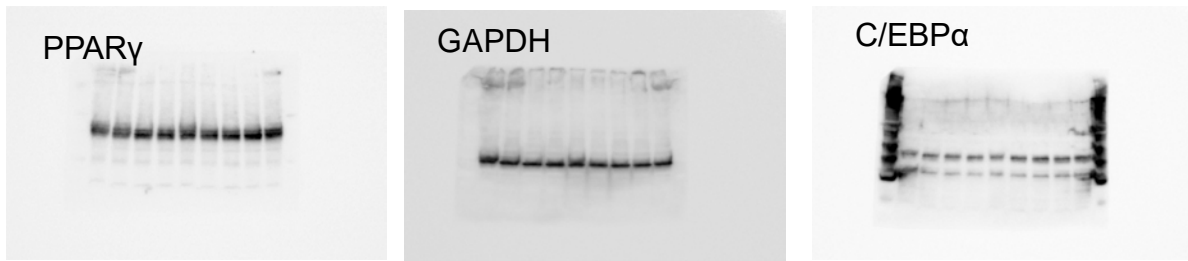

# Supplementary Figure 8

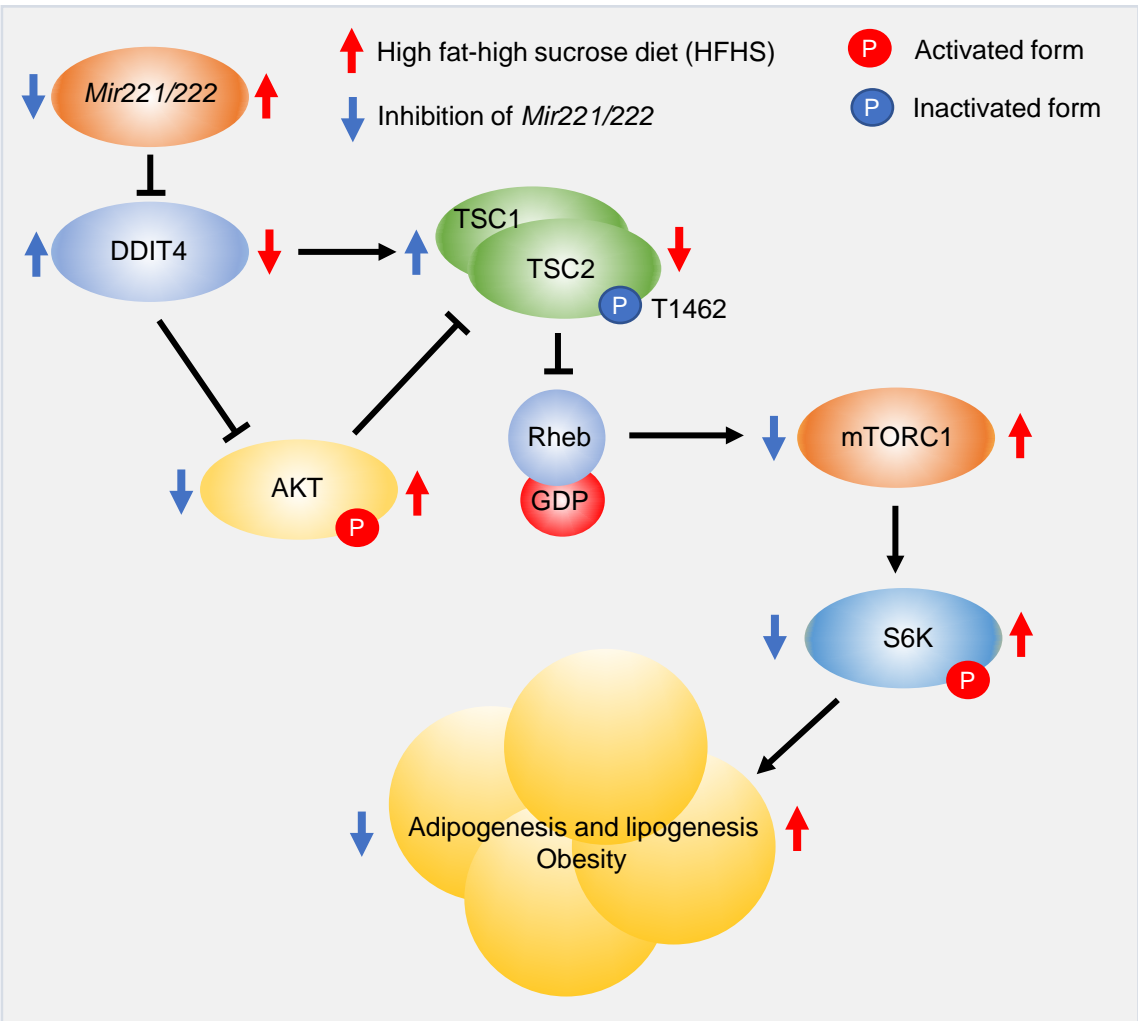

**Supplementary Figure 8.** Ddit4 is a direct target of miR-221-3p and miR-222-3p and it inhibits mTORC1 pathway.
